# Supplementary material for: Desflurane Allows for a Faster Emergence When Compared to Sevoflurane without Affecting the Baseline Cognitive Recovery Time
Source: PubMed Central journal article supplement (PMC4623413; doi:10.3389/fmed.2015.00075), 2015-10-28
Supplement: table_1.pdf [file table_1.pdf]

Appendix 1.

Short Orientation Memory Concentration Test\*

| Items | Question                                                                                                                             | Maximum Error | Score | Points | Total |
|-------|--------------------------------------------------------------------------------------------------------------------------------------|---------------|-------|--------|-------|
| 1     | What is the current year?                                                                                                            | 1             |       | x 4    |       |
| 2     | What month is it now?<br><i>Memory Phrase</i><br><i>Repeat this phrase after me:</i><br><i>John Brown, 42 Market Street, Chicago</i> | 1             |       | x 3    |       |
| 3     | About what time is it? (within 1 hour)                                                                                               | 1             |       | x3     |       |
| 4     | Count backwards from 20 to 1                                                                                                         | 2             |       | x2     |       |
| 5     | Say the months of the year in reverse order                                                                                          | 2             |       | x2     |       |
| 6     | Repeat the memory phrase. Each of the following is worth 1 point:<br>-John<br>-Brown<br>-42<br>-Market Street<br>-Chicago            | 5             |       | x2     |       |

\*Score ranges from 0 to 28. The higher the score indicates better cognitive function. Scores over 20 points are considered 'normal'.
